# Supplementary material for: A remarkably ultra-sensitive large area matrix of MXene based multifunctional physical sensors (pressure, strain, and temperature) for mimicking human skin
Source: Royal Society of Chemistry journal article supplement (doi:10.1039/d1tb00947h), 2021-01-01
Supplement: d1tb00947h1.pdf [file d1tb00947h1.pdf]

## Supplementary Information

### Remarkably Ultra-Sensitive Large area matrix of MXene based Multifunctional Physical Sensors (Pressure, Strain, and Temperature) for Mimicking the Human Skin

Vivek Adepu<sup>1</sup>, Venkat Mattela<sup>2</sup> and Parikshit Sahatiya<sup>1\*</sup>

<sup>1</sup> Department of Electrical and Electronics Engineering, Birla Institute of Technology and Science Pilani Hyderabad Campus, Hyderabad, 500078, India.

<sup>2</sup> Ceremorphic, Inc. San Jose, California, 95131, USA

\*E-mail of Corresponding Author: parikshit@hyderabad.bits-pilani.ac.in.

**Table S1:** Table displaying response time of the fabricated sensor at varied pressure

| Sl.No | Pressure Applied (kPa) | Response Time (msec) |
|-------|------------------------|----------------------|
| 1.    | 1.477                  | 316                  |
| 2.    | 1.729                  | 302                  |
| 3.    | 2.167                  | 310                  |
| 4.    | 3.185                  | 310                  |

**Table S2:** Table displaying response time of the fabricated sensor at varied strain

| Sl.No | Strain Applied(%) | Response Time (msec) |
|-------|-------------------|----------------------|
| 1.    | 5                 | 510                  |
| 2.    | 7                 | 510                  |
| 3.    | 10                | 511                  |
| 4.    | 15                | 514                  |
| 5.    | 20                | 524                  |

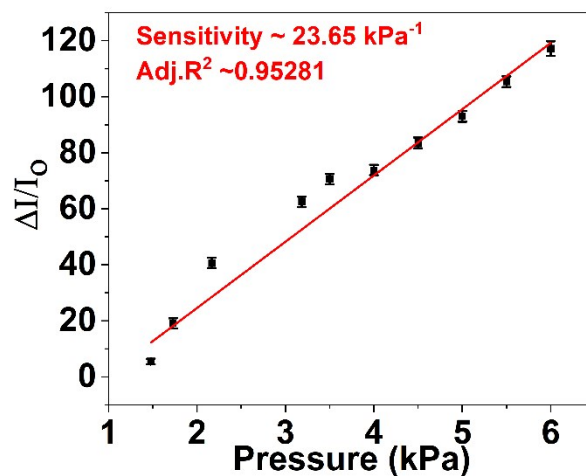

**Figure S1:** Sensitivity plot displaying sensitivity value of  $\sim 23.65 \text{ kPa}^{-1}$  at applied pressure range between 1.477 – 6 kPa.

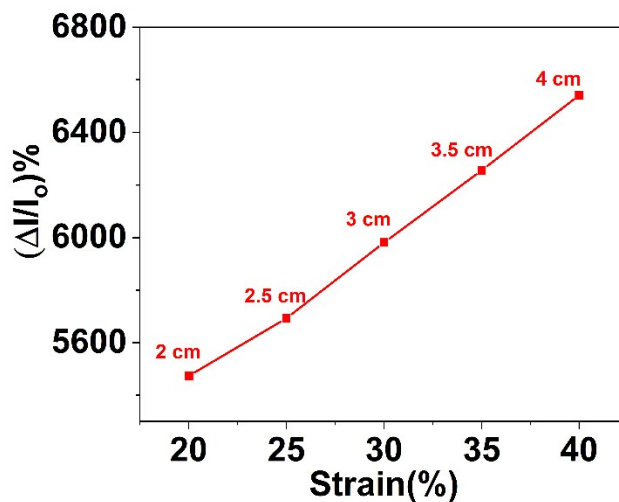

**Figure S2:** Normalized Current is plotted against applied strain on the fabricated sensor, wherein by increasing the length of the sensor a proportionate increase in current value was observed.

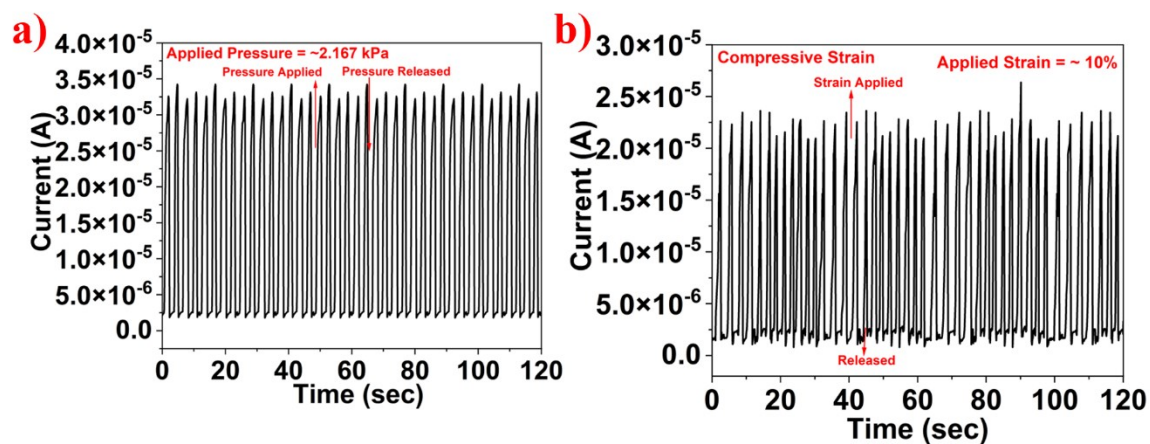

**Figure S3:** a) Temporal Response of the fabricated sensor (i.e. after dipping in DI-Water followed by drying) under the constant pressure of  $\sim 2.167$  kPa, b) Temporal Response of the fabricated sensor (i.e. after dipping in DI-Water followed by drying) under the constant applied strain of 10%.

### Consent statement

The authors declare that informed consent was obtained from all the human participants for the experiments that involved them.
